# Supplementary material for: Homocysteine promotes hepatic steatosis by activating the adipocyte lipolysis in a HIF1α-ERO1α-dependent oxidative stress manner
Source: PubMed Central journal article supplement — Redox Biol. 2020 Oct 1;37:101742. doi: 10.1016/j.redox.2020.101742 (PMC7559542; doi:10.1016/j.redox.2020.101742), 2020-10-01
Supplement: mmc1.pdf [file mmc1.pdf]

# 1 **Supplemental Information**

## 2 **Homocysteine promotes hepatic steatosis by activating the adipocyte** 3 **lipolysis in a HIF1 $\alpha$ -ERO1 $\alpha$ -dependent oxidative stress manner**

4  
5 Yu Yan<sup>a</sup>, Xun Wu<sup>b,c</sup>, Pengcheng Wang<sup>a</sup>, Songyang Zhang<sup>a</sup>, Lulu Sun<sup>a</sup>, Yang Zhao<sup>d</sup>,  
6 GuangYi Zeng<sup>a</sup>, Bo Liu<sup>a</sup>, Guoheng Xu<sup>a</sup>, Huiying Liu<sup>a</sup>, Lei Wang<sup>b,c\*</sup>, Xian Wang<sup>a\*</sup> and  
7 Changtao Jiang<sup>a,e,f\*</sup>

8  
9 <sup>a</sup>Department of Physiology and Pathophysiology, School of Basic Medical Sciences,  
10 Peking University, Key Laboratory of Molecular Cardiovascular Science, Ministry of  
11 Education, Beijing 100191, People's Republic of China

12 <sup>b</sup>National Laboratory of Biomacromolecules, CAS Center for Excellence in  
13 Biomacromolecules, Institute of Biophysics, Chinese Academy of Sciences, Beijing  
14 100101, People's Republic of China

15 <sup>c</sup>College of Life Sciences, University of Chinese Academy of Sciences, Beijing 100049,  
16 People's Republic of China

17 <sup>d</sup>Department of Laboratory Medicine, Peking University Third Hospital, Beijing  
18 100191, People's Republic of China

19 <sup>e</sup>Center of Basic Medical Research, Institute of Medical Innovation and Research,  
20 Third Hospital, Peking University, Beijing, 100191, PR China

21 <sup>f</sup>Center for Obesity and Metabolic Disease Research, School of Basic Medical  
22 Sciences, Peking University, Beijing, 100191, PR China

23 \*Correspondence to Changtao Jiang (Tel: +86-10-82801440, E-mail address:  
24 jiangchangtao@bjmu.edu.cn), Xian Wang (Tel: +86-10-82801443, E-mail address:  
25 xwang@bjmu.edu.cn) and Lei Wang (Tel: +86-10-64888501, E-mail address:  
26 wanglei@ibp.ac.cn).

27

28 **Supplementary Figures**

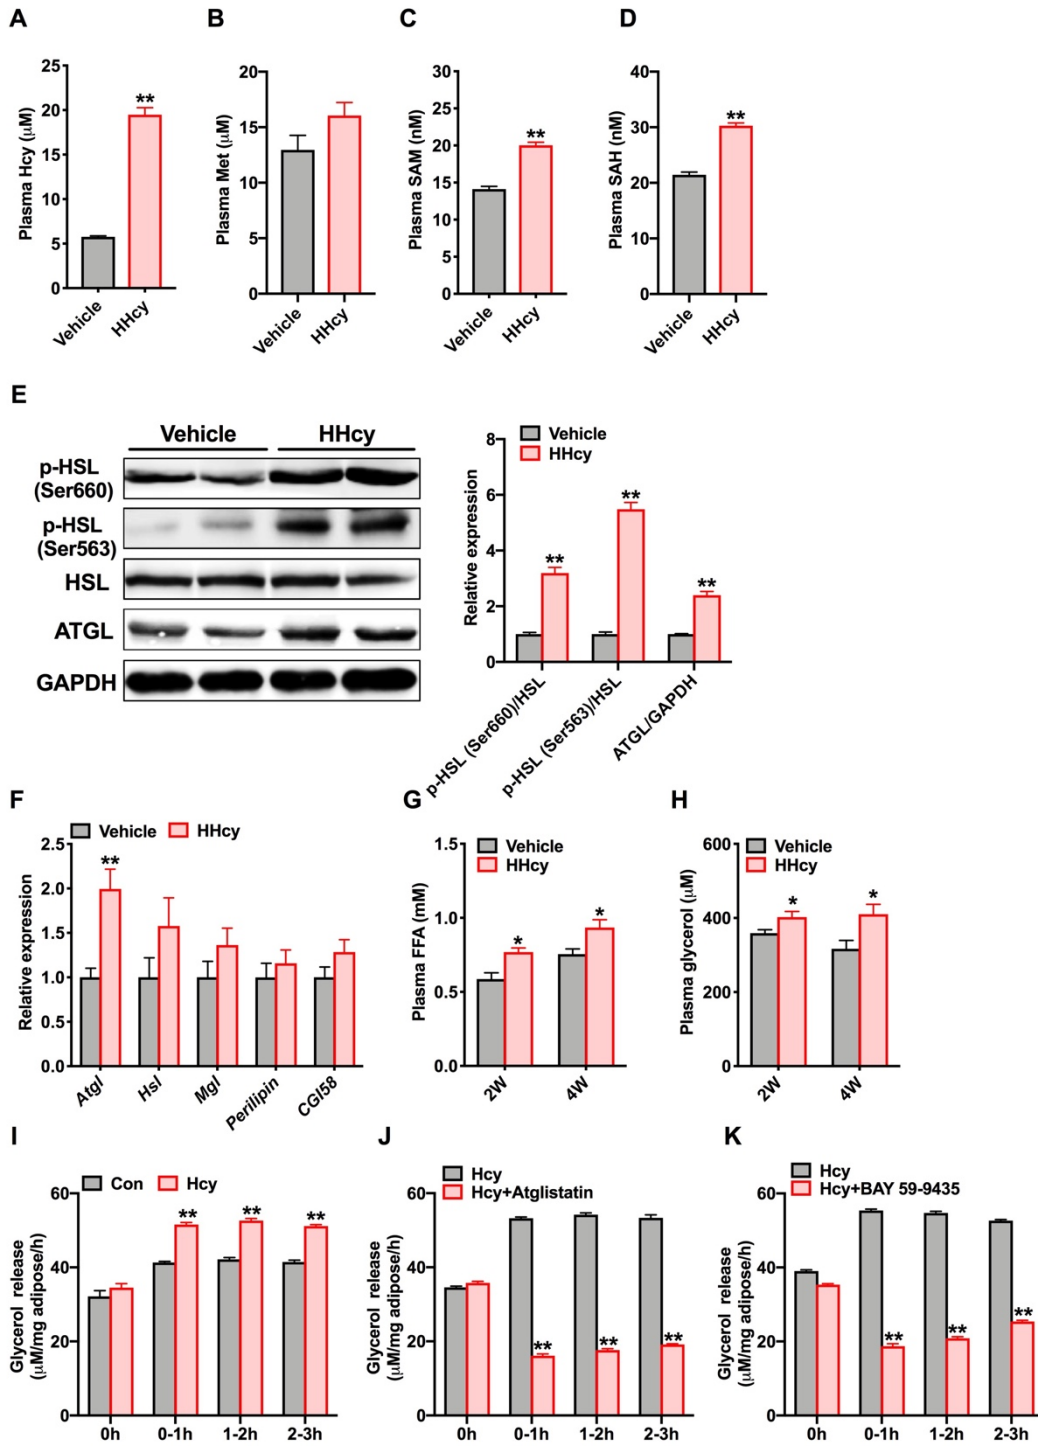

29

30 **Figure S1. Hcy activates the lipolytic process in adipose tissue (Related to Figure**  
 31 **1)**

32 (A-D) Levels of plasma Hcy, Met, SAM and SAH (n=6). Met, methionine; SAM, S-  
 33 adenosylmethionine; SAH, S-adenosyl-L-homocysteine.

34 C57BL/6 mice (8 weeks old) were administered Hcy in the drinking water for 4 weeks.  
35 (E) Protein levels of ATGL and phosphorylation levels of HSL at the Ser660 and  
36 Ser563 residues (n=4). (F) The relative expression of genes involved in adipose tissue  
37 lipolysis (n=6).

38 C57BL/6 mice (8 weeks old) were administered Hcy in the drinking water for 2 or 4  
39 weeks. (G, H) Plasma FFAs and glycerol levels after fasting for 24 h at the indicated  
40 time (n=6). (A) Mann-Whitney U test and (B-H) Two-tailed Student's t-test: \* $P < 0.05$ ,  
41 \*\* $P < 0.01$  compared to the vehicle group.

42 (I) Isolated mice eWAT were incubated with or without 500  $\mu\text{M}$  Hcy for 8 h, the  
43 glycerol release per hour in freshly changed medium was examined (n=6). \*\* $P < 0.01$   
44 compared to the control group (J, K) After pretreatment with lipolysis inhibitor for 1 h,  
45 the eWAT were treated with Hcy (500  $\mu\text{M}$ ) for 8h. The glycerol release per hour in  
46 freshly changed medium was detected. Atglistatin, ATGL inhibitor, 10  $\mu\text{M}$ ; BAY 59-  
47 9435, HSL inhibitor, 5  $\mu\text{M}$ . \*\* $P < 0.01$  compared to the Hcy group. All of the data are  
48 presented as the means  $\pm$  SEM.

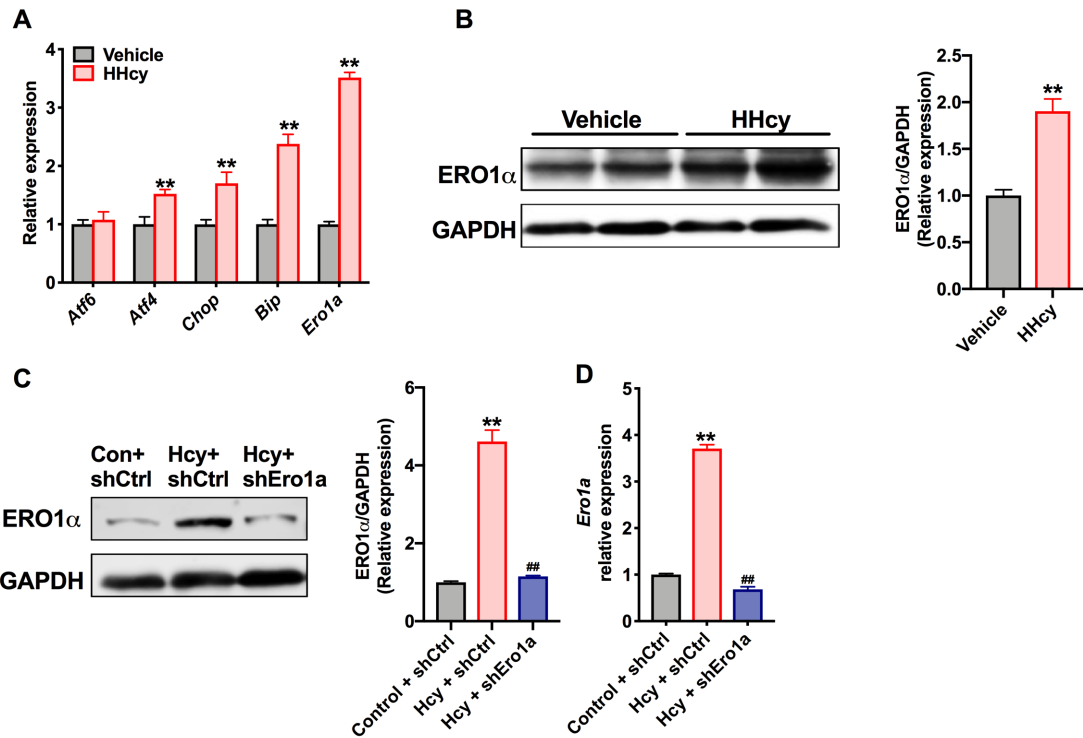

49

50 **Figure S2. Hcy upregulates the expression of ERO1α (Related to Figure 4)**

51 (A) The relative expression of genes related to ER stress markers in the vehicle or HHcy  
 52 mice (n=6). (B) C57BL/6 mice (8 weeks old) were administered Hcy in the drinking  
 53 water for 4 weeks. Protein levels of ERO1α (n=3). (C, D) 3T3-L1 cells transduced with  
 54 lentiviral control shRNA (shCtrl) or shEro1a for more than 72 h were treated with 500  
 55 μM Hcy. The protein and mRNA levels of ERO1α (n=3 or 5).  
 56 All of the data are presented as the means ± SEM. (A, B) Two-tailed Student's t-test:  
 57 \*\* $P < 0.01$  compared to the vehicle group. (C, D) One-way ANOVA with Tukey's  
 58 post-hoc test: \*\* $P < 0.01$  compared to the control + shCtrl group. ## $P < 0.01$  compared  
 59 to the Hcy + shCtrl group.

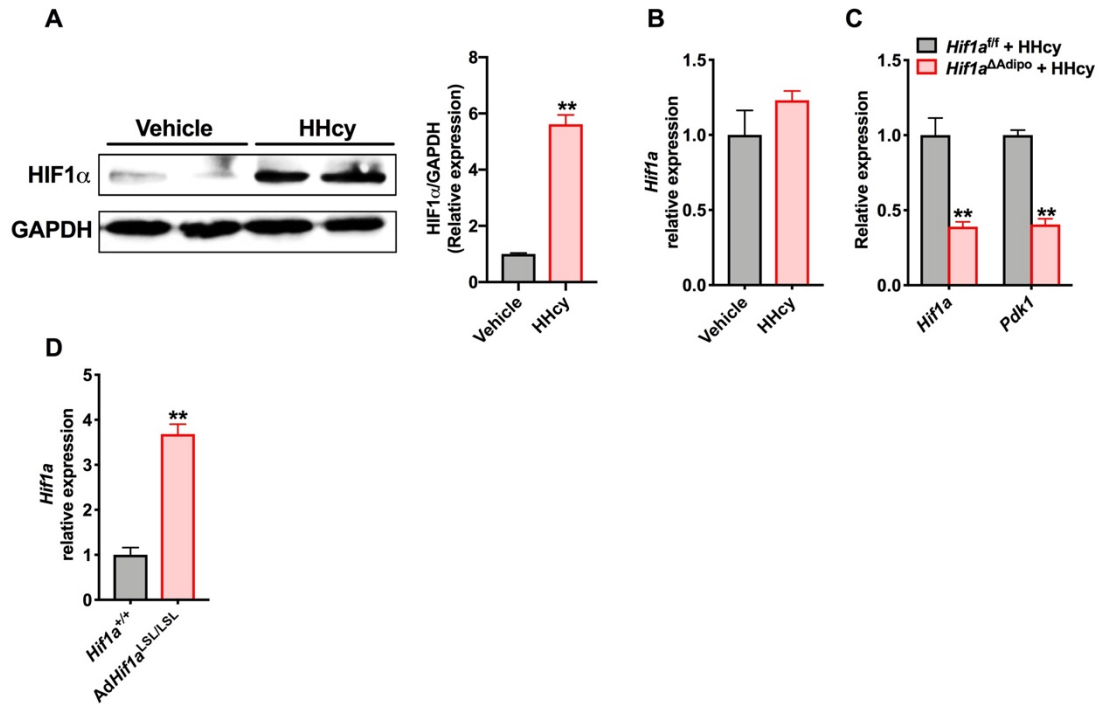

60

61 **Figure S3. Activation of HIF1 $\alpha$  mediates Hcy-induced ERO1 $\alpha$  expression in**  
 62 **adipocytes (Related to Figure 5)**

63 (A, B) Protein and mRNA levels of HIF1 $\alpha$  in the eWAT of vehicle and HHcy mice  
 64 (n=3 or 6). Two-tailed Student's t-test: \*\* $P < 0.01$  compared to the vehicle group. (C)

65 The relative expression of the *Hif1a* and *Pdk1* genes in the eWAT of *Hif1a*<sup>fl/fl</sup> and  
 66 *Hif1a* <sup>$\Delta$ Adipo</sup> mice after 8 weeks on an HMD (n=6). Two-tailed Student's t-test: \*\* $P <$

67 0.01 compared to the *Hif1a*<sup>fl/fl</sup> + Hcy group. (D) The mRNA levels of HIF1 $\alpha$  in the  
 68 eWAT of *Hif1a*<sup>+/+</sup> and Ad*Hif1a*<sup>LSL/LSL</sup> mice (n=6). Two-tailed Student's t-test: \*\* $P <$

69 0.01 compared to the *Hif1a*<sup>+/+</sup> group. All of the data are presented as the means  $\pm$  SEM.

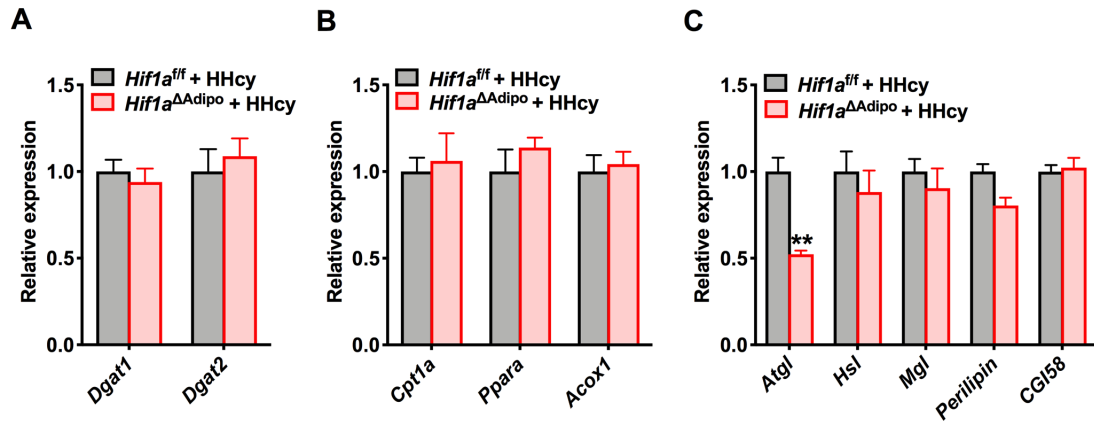

70

71 **Figure S4. The lipolytic gene was downregulated in Hcy-treated *Hif1a<sup>ΔAdipo</sup>* mice**  
 72 **(Related to Figure 6)**

73 (A-C) The relative expression of genes involved in TG synthesis, fatty acid oxidation  
 74 and lipolysis (n=6). All of the data are presented as the means ± SEM. Two-tailed  
 75 Student's t-test: \*\* $P < 0.01$  compared to the *Hif1a<sup>fl/fl</sup>* + HHcy group.

76

77

78

79

80

81

82

83

84 **Supplementary Tables**85 **Table S1**86 **Characteristical data for nonhyperhomocysteinemia or hyperhomocysteinemia**

| Groups                             | Nonhyperhomocysteinemia | Hyperhomocysteinemia |
|------------------------------------|-------------------------|----------------------|
| Sex, M/F, n/n                      | 13/39                   | 43/15                |
| Age, yr                            | 43.5±1.7                | 47.1±2.3             |
| Body mass index, kg/m <sup>2</sup> | 21.80±0.22              | 22.45±0.26           |
| Homocysteine, µmol/l               | 9.72±0.31               | 29.96±2.15**         |
| Triglycerides, mmol/l              | 0.75±0.02               | 1.64±0.10**          |
| Total cholesterol, mmol/l          | 4.45±0.12               | 4.52±0.11            |
| HDL cholesterol, mmol/l            | 1.51±0.05               | 1.17±0.03**          |
| LDL cholesterol, mmol/l            | 2.63±0.09               | 2.85±0.10            |

87 Data are expressed by mean ± SEM. \*\**P* < 0.01 compared to the nonhyperhomo-  
88 cysteinemia group.

89

90 **Table S2. Primer sequences for qPCR**

| qPCR primers     | Sequence (5' to 3')     |
|------------------|-------------------------|
| m <i>Dgat1</i> u | TCCGTCCAGGGTGGTAGTG     |
| m <i>Dgat1</i> l | TGAACAAAGAATCTTGCAGACGA |
| m <i>Dgat2</i> u | GCGCTACTTCCGAGACTACTT   |
| m <i>Dgat2</i> l | GGGCCTTATGCCAGGAAACT    |
| m <i>Atgl</i> u  | CTGAGAATCACCATTCCCACATC |
| m <i>Atgl</i> l  | CACAGCATGTAAGGGGGAGA    |
| m <i>Hsl</i> u   | CCAGCCTGAGGGCTTACTG     |
| m <i>Hsl</i> l   | CTCCATTGACTGTGACATCTCG  |
| m <i>Mgl</i> u   | AGGCGAACTCCACAGAATGTT   |

|                      |                |              |
|----------------------|----------------|--------------|
| m <i>Mgl</i> l       | ACAAAAGAGGTA   | CTGTCCGTCT   |
| m <i>Perilipin</i> u | GGGACCTGTGAG   | TGCTTCC      |
| m <i>Perilipin</i> l | GTATTGAAGAGCC  | GGGATCTTTT   |
| m <i>CGI58</i> u     | TGGTGTCCCACAT  | CTACATCA     |
| m <i>CGI58</i> l     | CAGCGTCCATATT  | CTGTTTCCA    |
| m <i>Cd36</i> u      | AGATGACGTGGCA  | AAGAACAG     |
| m <i>Cd36</i> l      | CCTTGGCTAGATA  | ACGAACTCTG   |
| m <i>Fabp1</i> u     | ATGAACTTCTCCG  | GCAAGTACC    |
| m <i>Fabp1</i> l     | CTGACACCCCCTT  | GATGTCC      |
| m <i>Fasn</i> u      | AAGTTGCCCGAGT  | CAGAGAACC    |
| m <i>Fasn</i> l      | ATCCATAGAGCCC  | CAGCCTTCCATC |
| m <i>Acc</i> u       | GATGAACCATCTC  | CGTTGGC      |
| m <i>Acc</i> l       | GACCCAATTATGA  | ATCGGGAGTG   |
| m <i>Srebplc</i> u   | GGAGCCATGGATT  | GACATT       |
| m <i>Srebplc</i> l   | GCTTCCAGAGAGG  | AGGCCAG      |
| m <i>Cpt1a</i> u     | CTCCGCCTGAGCC  | ATGAAG       |
| m <i>Cpt1a</i> l     | CACCAGTGATGAT  | GCCATTCT     |
| m <i>Ppara</i> u     | AGAGCCCCATCTG  | TCCTCTC      |
| m <i>Ppara</i> l     | ACTGGTAGTCTGCA | AAAACCAAA    |
| m <i>Acox1</i> u     | GGGCACGGCTATT  | CTCACAG      |
| m <i>Acox1</i> l     | CATCAAGAACCTG  | GCCGTCT      |
| m <i>ApoB</i> u      | AAGCACCTCCGAA  | AGTACGTG     |
| m <i>ApoB</i> l      | CTCCAGCTCTACCT | TACAGTTGA    |
| m <i>Mttp</i> u      | CTCTTGGCAGTGCT | TTTTTCTCT    |
| m <i>Mttp</i> l      | GAGCTTGTATAGCC | GCTCATT      |
| m <i>Erola</i> u     | TTCTGCCAGGTTAG | TGGTTACC     |
| m <i>Erola</i> l     | GTTTGACGGCACAG | TCTCTTC      |
| m <i>Hif1a</i> u     | ATAGCTTCGCAGA  | ATGCTCAGA    |



|                  |                        |
|------------------|------------------------|
| m <i>Hif1a l</i> | CAGTCACCTGGTTGCTGCAA   |
| m <i>Atf6 u</i>  | GACTCACCCATCCGAGTTGTG  |
| m <i>Atf6 l</i>  | CTCCCAGTCTTCATCTGGTCC  |
| m <i>Atf4 u</i>  | ATGGCGCTCTTCACGAAATC   |
| m <i>Atf4 l</i>  | ACTGGTCGAAGGGGTCATCAA  |
| m <i>Chop u</i>  | CTGGAAGCCTGGTATGAGGAT  |
| m <i>Chop l</i>  | CAGGGTCAAGAGTAGTGAAGGT |
| m <i>Bip u</i>   | ACTTGGGGACCACCTATTCTT  |
| m <i>Bip l</i>   | ATCGCCAATCAGACGCTCC    |

91

92

**Table S3. Primer sequences for ChIP**

| ChIP primers        | Sequence (5' to 3') |
|---------------------|---------------------|
| <i>Erola</i> HRE1 u | GCCAGGTGTACCGGAGG   |
| <i>Erola</i> HRE1 l | TGTCCACGCGAGCCT     |
| <i>Erola</i> HRE2 u | TACCCCGACCCCGGAAG   |
| <i>Erola</i> HRE2 l | CTCTGTCCACGCGAGCCT  |

93
